# Supplementary material
Source: PubMed Central journal article supplement (PMC7510336)
Supplement: ehp6552.s001.acco.pdf [file ehp6552.s001.acco.pdf]

**Note to readers with disabilities:** *EHP* strives to ensure that all journal content is accessible to all readers. However, some figures and Supplemental Material published in *EHP* articles may not conform to [508 standards](#) due to the complexity of the information being presented. If you need assistance accessing journal content, please contact [ehp508@niehs.nih.gov](mailto:ehp508@niehs.nih.gov). Our staff will work with you to assess and meet your accessibility needs within 3 working days.

### **Supplemental Material**

#### **Developing a Health Impact Model for Adult Lead Exposure and Cardiovascular Disease Mortality**

Lauren Brown, Meghan Lynch, Anna Belova, Ryan Klein, and Andrea Chiger

#### **Table of Contents**

**Table S1.** Summary of Population Characteristics for Studies Examining the Association between Pb Exposure and CVD Mortality.

#### **References**

**Table S1. Summary of Population Characteristics for Studies Examining the Association between Pb Exposure and CVD Mortality**

| <b>Study</b>                                                                                                                                                                             | <b>Applicable to the General Population</b> | <b>Reported Average Blood Pb Levels &lt;5 µg/dL (Mean blood Pb level unless otherwise noted)</b> |
|------------------------------------------------------------------------------------------------------------------------------------------------------------------------------------------|---------------------------------------------|--------------------------------------------------------------------------------------------------|
| <b>Identified through NTP Monograph and EPA ISA</b>                                                                                                                                      |                                             |                                                                                                  |
| Cocco et al. (2007)<br>Causes of death among lead smelters in relation to the glucose-6-phosphate dehydrogenase polymorphism                                                             |                                             | <sup>a</sup>                                                                                     |
| Khalil et al. (2009)<br>Association of blood lead concentrations with mortality in older women: a prospective cohort study                                                               | X                                           | (5.3 µg/dL)                                                                                      |
| Lin et al. (2011)<br>Association of blood lead levels with mortality in patients on maintenance hemodialysis                                                                             |                                             | (median: 10.4 µg/dL)                                                                             |
| Lustberg and Silbergeld (2002)<br>Blood lead levels and mortality                                                                                                                        | X                                           | (14.0 µg/dL)                                                                                     |
| <b>Menke et al. (2006)</b><br><b>Blood lead below 0.48 µmol/l (10 µg/dL) and mortality among US adults</b>                                                                               | <b>X</b>                                    | <b>X</b><br><b>(2.58 µg/dL)</b>                                                                  |
| Neuberger et al. (2009)<br>Potential health impacts of heavy-metal exposure at the Tar Creek Superfund site, Ottawa County, Oklahoma                                                     | X                                           | <sup>a</sup>                                                                                     |
| Schober et al. (2006)<br>Blood lead levels and death from all causes, CVD, and cancer: results from the NHANES III mortality study                                                       | X                                           | X<br>(median: 4.14 µg/dL) <sup>b</sup>                                                           |
| Weisskopf et al. (2009)<br>A prospective study of bone lead concentration and death from all causes, CVD, and cancer in the Department of Veterans Affairs Normative Aging Study         | X                                           | (5.6 µg/dL)                                                                                      |
| <b>Identified through supplemental literature review</b>                                                                                                                                 |                                             |                                                                                                  |
| <b>Aoki et al. (2016)</b><br><b>Blood lead and other metal biomarkers as risk factors for cardiovascular disease mortality</b>                                                           | <b>X</b>                                    | <b>X</b><br><b>(1.73 µg/dL)</b>                                                                  |
| Bertke et al. (2016)<br>Mortality of lead smelter workers: A follow-up study with exposure assessment                                                                                    |                                             | <sup>a</sup>                                                                                     |
| <b>Lanphear et al. (2018)</b><br><b>Low-level lead exposure and mortality in US adults: a population-based cohort study</b>                                                              | <b>X</b>                                    | <b>2.71 µg/dL</b>                                                                                |
| McElvenny et al. (2015)<br>Mortality of a cohort of workers in Great Britain with blood lead measurements                                                                                |                                             | (44.3 µg/dL)                                                                                     |
| <b>Ruiz-Hernandez et al. (2017)</b><br><b>Declining exposures to lead and cadmium contribute to explaining the reduction of cardiovascular mortality in the US population, 1988-2004</b> | <b>X</b>                                    | <b>NHANES III: 3.2 µg/dL</b><br><b>1999-2004: 1.9 µg/dL</b>                                      |

| <b>Study</b>                                                                                                                                       | <b>Applicable to the General Population</b> | <b>Reported Average Blood Pb Levels &lt;5 µg/dL (Mean blood Pb level unless otherwise noted)</b> |
|----------------------------------------------------------------------------------------------------------------------------------------------------|---------------------------------------------|--------------------------------------------------------------------------------------------------|
| Wang et al. (2011)<br>Long-term heavy metal pollution and mortality in a Chinese population: an ecologic study                                     |                                             | (17.8 µg/dL) <sup>a</sup>                                                                        |
| Weisskopf et al. (2015)<br>Biased exposure–health effect estimates from selection in cohort studies: are environmental studies at particular risk? | X                                           | (5.5 µg/dL)                                                                                      |

Note: This table provides additional details on the literature review, comparing all 15 identified studies against the criteria laid out in Step 3 of the methods. The four studies bolded in the table (Aoki et al. 2016; Lanphear et al. 2018; Menke et al. 2006; Ruiz-Hernandez et al. 2017) fit the criteria of having blood Pb levels, on average, less than 5 µg/dL and being applicable to the general population.

<sup>a</sup> No blood Pb data were presented for this study.

<sup>b</sup> No overall mean or median blood Pb level was presented. This value is a calculated weighted mean blood Pb level based on the cohort population characteristics presented in Table 1 of Schober et al. (2006) and Table 2 of Wang et al. (2011), respectively.

## References

- Aoki Y, Brody DJ, Flegal KM, Fakhouri TH, Parker JD, Axelrad DA. 2016. Blood Lead and Other Metal Biomarkers as Risk Factors for Cardiovascular Disease Mortality. *Medicine (Baltimore)* 95(1):e2223, PMID: 26735529, 10.1097/md.0000000000002223.
- Bertke SJ, Lehman EJ, Wurzelbacher SJ, Hein MJ. 2016. Mortality of lead smelter workers: A follow-up study with exposure assessment. *Am J Ind Med* 59(11):979-986.
- Cocco P, Fadda D, Atzeri S, Avataneo G, Meloni M, Flore C. 2007. Causes of death among lead smelters in relation to the glucose-6-phosphate dehydrogenase polymorphism. *Occup Environ Med* 64(6):414-416, PMID: 17182638, 10.1136/oem.2006.028779.
- Khalil N, Wilson JW, Talbott EO, Morrow LA, Hochberg MC, Hillier TA, et al. 2009. Association of blood lead concentrations with mortality in older women: a prospective cohort study. *Environmental Health* 8(1):1-10, 10.1186/1476-069x-8-15.
- Lanphear BP, Rauch S, Auinger P, Allen RW. 2018. Low-level lead exposure and mortality in US adults: a population-based cohort study. *The Lancet Public Health* 3(4):e177-e184.
- Lin JL, Lin-Tan DT, Hsu CW, Yen TH, Chen KH, Hsu HH, et al. 2011. Association of blood lead levels with mortality in patients on maintenance hemodialysis. *Am J Med* 124(4):350-358, PMID: 21435426, 10.1016/j.amjmed.2010.10.022.
- Lustberg M, Silbergeld E. 2002. Blood lead levels and mortality. *Arch Intern Med* 162(21):2443-2449, PMID: 12437403.
- McElvenny DM, Miller BG, MacCalman LA, Sleuwenhoek A, van Tongeren M, Shepherd K, et al. 2015. Mortality of a cohort of workers in Great Britain with blood lead measurements. *Occup Environ Med* 72(9):625-632.
- Menke A, Muntner P, Batuman V, Silbergeld EK, Guallar E. 2006. Blood lead below 0.48 micromol/L (10 microg/dL) and mortality among US adults. *Circulation* 114(13):1388-1394, PMID: 16982939, 10.1161/circulationaha.106.628321.
- Neuberger J, Hu S, Drake K, Jim R. 2009. Potential health impacts of heavy-metal exposure at the Tar Creek Superfund site, Ottawa County, Oklahoma. *Environ Geochem Health* 31(1):47-59, 10.1007/s10653-008-9154-0.
- Ruiz-Hernandez A, Navas-Acien A, Pastor-Barriuso R, Cranceanu CM, Redon J, Guallar E, et al. 2017. Declining exposures to lead and cadmium contribute to explaining the reduction of cardiovascular mortality in the US population, 1988–2004. *Int J Epidemiol* 46(6):1903-1912.
- Schober SE, Mirel LB, Graubard BI, Brody DJ, Flegal KM. 2006. Blood lead levels and death from all causes, cardiovascular disease, and cancer: Results from the NHANES III Mortality Study. *Environ Health Perspect* 114(10):1538-1541.
- Wang M, Xu Y, Pan S, Zhang J, Zhong A, Song H, et al. 2011. Long-term heavy metal pollution and mortality in a Chinese population: an ecologic study. *Biol Trace Elem Res* 142(3):362-379.
- Weisskopf MG, Jain N, Nie H, Sparrow D, Vokonas P, Schwartz J, et al. 2009. A prospective study of bone lead concentration and death from all causes, cardiovascular diseases, and cancer in the Department of Veterans Affairs Normative Aging Study. *Circulation* 120(12):1056-1064, PMID: 19738141, 10.1161/circulationaha.108.827121.
- Weisskopf MG, Sparrow D, Hu H, Power MC. 2015. Biased Exposure-Health Effect Estimates from Selection in Cohort Studies - Are Environmental Studies at Particular Risk? *Environ Health Perspect* 123(11):1113–1122.
