# Supplementary material
Source: PubMed Central journal article supplement (PMC7510336)
Supplement: ehp6552.smcontents.508.pdf [file ehp6552.smcontents.508.pdf]

**Note to readers with disabilities:** *EHP* strives to ensure that all journal content is accessible to all readers. However, some figures and Supplemental Material published in *EHP* articles may not conform to [508 standards](#) due to the complexity of the information being presented. If you need assistance accessing journal content, please contact [ehp508@niehs.nih.gov](mailto:ehp508@niehs.nih.gov). Our staff will work with you to assess and meet your accessibility needs within 3 working days.

### **Supplemental Material**

#### **Developing a Health Impact Model for Adult Lead Exposure and Cardiovascular Disease Mortality**

Lauren Brown, Meghan Lynch, Anna Belova, Ryan Klein, and Andrea Chiger

#### **Table of Contents**

**Table S1.** Summary of Population Characteristics for Studies Examining the Association between Pb Exposure and CVD Mortality.

#### **References**
